1 **Dissecting the basis of novel trait evolution in a radiation with widespread**  
2 **phylogenetic discordance**

3

4

5

6 Meng Wu<sup>1</sup>, Jamie L. Kostyun<sup>1,2</sup>, Matthew W. Hahn<sup>1,3</sup>, and Leonie C. Moyle<sup>1,\*</sup>

7

8 <sup>1</sup>Department of Biology, Indiana University, Bloomington, Indiana, U.S.A. 47405

9 <sup>2</sup> Department of Plant Biology, University of Vermont, Burlington, Vermont, U.S.A.,  
10 05401

11 <sup>3</sup>Department of Computer Science, Indiana University, Bloomington, Indiana, U.S.A.  
12 47405

13

14

15 \*Corresponding author: Email: [lmoyle@indiana.edu](mailto:lmoyle@indiana.edu)

16

17 RRH: Trait evolution under widespread discordance

18

19

20

21

22

23 **ABSTRACT**

24 Phylogenetic analyses of trait evolution can provide insight into the evolutionary  
25 processes that initiate and drive phenotypic diversification. However, recent  
26 phylogenomic studies have revealed extensive gene tree-species tree discordance, which  
27 can lead to incorrect inferences of trait evolution if only a single species tree is used for  
28 analysis. This phenomenon—dubbed “hemiplasy”—is particularly important to consider  
29 during analyses of character evolution in rapidly radiating groups, where discordance is  
30 widespread. Here we generate whole-transcriptome data for a phylogenetic analysis of 14  
31 species in the plant genus *Jaltomata* (the sister clade to *Solanum*), which has experienced  
32 rapid, recent trait evolution, including in fruit and nectar color, and flower size and shape.  
33 Consistent with other radiations, we find evidence for rampant gene tree discordance due  
34 to incomplete lineage sorting (ILS) and several introgression events among the well-  
35 supported subclades. Since both ILS and introgression increase the probability of  
36 hemiplasy, we perform several analyses that take discordance into account while  
37 identifying genes that might contribute to phenotypic evolution. Despite discordance, the  
38 history of fruit color evolution in *Jaltomata* can be inferred with high confidence, and we  
39 find evidence of *de novo* adaptive evolution at individual genes associated with fruit  
40 color variation. In contrast, hemiplasy appears to strongly affect inferences about floral  
41 character transitions in *Jaltomata*, and we identify candidate loci that could arise either  
42 from multiple lineage-specific substitutions or standing ancestral polymorphisms. Our  
43 analysis provides a generalizable example of how to manage discordance when  
44 identifying loci associated with trait evolution in a radiating lineage.

45

46 *Key words:* phylogenomics, rapid radiation, hemiplasy, convergence, *Jaltomata*, *Solanum*

47

## 48 **INTRODUCTION**

49           Phylogenies contribute to our understanding of the evolutionary history of traits  
50 (Felsenstein, 1985). When the patterns of relationship among species is known, robust  
51 inferences about character state evolution can be made, including the number of times a  
52 character evolved, the direction of character evolution, and the most likely ancestral  
53 character state. Phylogenies can also reveal whether lineages with similar phenotypic  
54 traits have evolved these via independent evolution (convergence or parallelism) or  
55 whether a single origin is more likely (Wake et al., 2011). The recent use of whole  
56 genomes or transcriptomes to make phylogenetic inferences from thousands to millions  
57 of sites (“phylogenomics”), has succeeded in its aim of generating species trees with high  
58 levels of statistical support. However, other genome-wide analyses have begun to reveal  
59 unexpected complexities in the evolutionary history of rapidly radiating lineages—  
60 including widespread gene tree discordance due to incomplete lineage sorting and/or  
61 introgression (Degnan & Rosenberg, 2009). This frequent discordance among individual  
62 gene trees can amplify incorrect inferences of trait evolution on even well-supported  
63 species trees. In particular, when a trait is determined by genes whose topologies do not  
64 match the species topology, incorrect inferences of homoplasy (independent evolution of  
65 the same character state) are substantially elevated—a phenomenon known as  
66 ‘hemiplasy’ (Avice & Robinson, 2008; Hahn & Nakhleh, 2016; Storz, 2016). Because  
67 understanding trait evolution—including the underlying genetic changes—is of particular  
68 interest in species radiations, extra care must be taken to consider and account for the  
69 influence of hemiplasy in these cases.

70           The fraction of the genome affected by hemiplasy will depend upon the amount  
71 and sources of gene tree discordance in a clade. In rapidly radiating species groups,  
72 widespread discordance has been attributed to the effects of both incomplete lineage  
73 sorting (ILS) and introgression between lineages (Degnan & Rosenberg, 2009). ILS  
74 affects gene tree topologies when segregating ancestral variation is maintained through  
75 consecutive speciation events (Maddison, 1997). Because the effect of ILS is proportional  
76 to ancestral population size, and inversely proportional to the time between speciation  
77 events (Pamilo & Nei, 1988), ILS is expected to be particularly exaggerated in radiations  
78 where a diverse ancestral population undergoes rapid speciation. Indeed, gene tree  
79 discordance has been noted for a substantial fraction of the genome in rapidly radiating  
80 groups, including the *Drosophila simulans* sub-clade (Garrigan et al., 2012), African  
81 cichlid fishes (Brawand et al., 2014), wild tomatoes (Pease et al., 2016), and the genus  
82 *Arabidopsis* (Novikova et al., 2016). When there is introgression, discordance emerges  
83 because genes that are introgressed among lineages will show historical patterns of  
84 relatedness that differ from the loci in the genome into which they are introduced.  
85 Substantial introgression has also been identified among rapidly radiating lineages  
86 through genome-wide analysis, including in *Xiphophorus* fishes (Cui et al., 2013),  
87 *Heliconius* butterflies (Martin et al., 2013), Darwin's finches (Lamichhaney et al., 2015),  
88 and *Anopheles* mosquitoes (Fontaine et al., 2015).

89           Both ILS and introgression contribute to hemiplasy because they cause a  
90 proportion of gene trees to disagree with the species tree (Avice & Robinson, 2008; Hahn  
91 & Nakhleh, 2016; Storz, 2016). Specifically, the probability of hemiplasy is expected to  
92 be 1) proportional to the fraction of gene trees that are discordant with the species tree;

93 and 2) negatively correlated with the branch length leading to clades with similar  
94 phenotypes (Hahn & Nakhleh, 2016). A higher proportion of discordant gene trees  
95 increases the probability that a character of interest is underpinned by genes that have a  
96 tree topology that differs from the species tree; shorter branch lengths increase the chance  
97 of incorrectly inferring homoplasy, as they leave relatively little time for convergent  
98 evolution to happen (Hahn & Nakhleh, 2016). Both conditions are expected to be  
99 exaggerated specifically in rapidly diversifying groups. Therefore, in these cases mapping  
100 characters onto a single species tree has a substantially elevated risk of incorrectly  
101 inferring the number of times a trait has evolved and the timing of trait changes (Avisé &  
102 Robinson, 2008; Hahn & Nakhleh, 2016; Storz, 2016). Hemiplasy also affects inferences  
103 about the specific loci inferred to underlie trait transitions because, when ILS or  
104 introgression are common, the substitutions underlying trait transitions may occur on  
105 gene trees that are discordant with the species tree (Mendes et al., 2016). Accordingly,  
106 genome-wide analyses must take into account the extent and distribution of ILS and  
107 introgression if they are to accurately infer the number and timing of evolutionary  
108 changes in specific traits, and the genes underlying these changes.

109 In this study, we used genome-wide data to investigate the morphologically and  
110 ecologically diverse plant genus *Jaltomata*, in which several key trait transitions appear  
111 to have occurred in parallel (Miller et al., 2011), and have been inferred to be  
112 independent convergent responses to similar selective pressures. However, because trait  
113 diversification has occurred in a relatively short period in this group, the probability of  
114 hemiplasy is also expected to be elevated. Our main goals were to assess the timing of  
115 lineage and trait diversification in the group, and to identify sources of genetic variation

116 that potentially contribute to rapid trait diversification in *Jaltomata*, while taking into  
117 account the potential for hemiplasy. To do so, we generated a clade-wide whole-  
118 transcriptome dataset and explicitly evaluated alternative scenarios to explain trait  
119 evolution by: 1) reconstructing phylogenetic relationships among target species, and  
120 evaluating the extent of discordance with the resulting inferred species tree; 2) evaluating  
121 patterns of trait variation and evolution in key reproductive (flower and fruit) characters,  
122 in the context of best and least supported nodes in this tree; and, 3) evaluating specific  
123 scenarios of the genetic changes associated with this trait evolution, in order to identify  
124 candidate loci that might be causally responsible. Our results imply two different  
125 scenarios of trait evolution for fruit color versus floral traits, reflecting the different  
126 amounts of hemiplasy associated with the two traits. While fruit color evolution in  
127 *Jaltomata* could be confidently inferred—along with potential *de novo* molecular changes  
128 on the relevant evolutionary branches—inferring the history of floral trait evolution and  
129 the potential contributing loci requires more careful treatment that considers the high  
130 probability of hemiplasy.

131

## 132 **MATERIALS AND METHODS**

### 133 Study system

134 The plant genus *Jaltomata* includes approximately 60-80 species, distributed from  
135 the southwestern United States through to the Andes of South America (Mione, 1992;  
136 Mione et al., 2015) (Figure 1). It is the sister genus to *Solanum*, the largest and most  
137 economically important genus in the family Solanaceae (Olmstead et al., 2008; Särkinen  
138 et al., 2013). Species of *Jaltomata* live in a wide range of habitats, and are phenotypically

139 diverse in vegetative, floral, and other reproductive traits (Mione 1992; Kostyun & Moyle  
140 2017). Floral diversity is particularly pronounced in *Jaltomata*. In comparison to closely  
141 related clades (including *Solanum*, *Capsicum*, and *Lycianthes*) which predominately have  
142 ‘flattened’ rotate corollas (petals) (Knapp, 2010), *Jaltomata* species exhibit a variety of  
143 corolla shapes, including rotate, as well as campanulate and tubular (Miller et al., 2011).  
144 All *Jaltomata* species also produce at least some nectar, including noticeably red- or  
145 orange-colored nectar in some lineages, while nectar is not produced by species in  
146 *Solanum*.

147       Species also differ in fruit color, and fruit color variation appears to characterize  
148 major subgroups within the genus as separate dark purple, red, and orange-fruited clades  
149 (Miller et al., 2011; Särkinen et al., 2013). Several species also have green fruit at  
150 maturity, although these lineages appear to be distributed across the three major  
151 *Jaltomata* clades, suggesting multiple convergent losses of fruit pigment (Miller et al.,  
152 2011). The first molecular phylogeny of this genus (Miller et al., 2011) was inferred from  
153 a single gene (*waxy*), and indicates that the lineage of species with red fruits is sister to  
154 the rest of the genus. However, a more recent study using seven loci (5 plastid and 2  
155 nuclear, including *waxy*) showed a conflicting topology, with purple-fruited lineages  
156 sister to the remaining groups, and red-fruited lineages more closely related to lineages  
157 with orange fruits (Särkinen et al., 2013). The inconsistency between the two studies  
158 might be the result of using few loci, or of reconstructions performed with loci that have  
159 different evolutionary histories.

160

161 *RNA preparation, sequencing, and transcript assembly*



162 We chose 14 target *Jaltomata* species that are distributed across the three  
163 previously identified major clades (Miller et al., 2011), and that span representative floral  
164 diversity within the genus (Figure 2A, Table S1). Tissues for RNA extraction included  
165 seven reproductive tissues (ranging from early bud, to mature pollinated flower, to early  
166 fruit) and four vegetative tissues (roots, early leaf buds, and young and mature leaves),  
167 from a single representative individual of each target species (see Supplementary text).  
168 All sampled individuals were housed at the Indiana University research greenhouse,  
169 under standardized temperature (15-20°C), watering (twice daily), and lighting (16-hour  
170 days) conditions.

171 Tissue collection and RNA extraction followed Pease et al. (2016): briefly, tissue  
172 was collected into pre-chilled tubes under liquid nitrogen, each sample was individually  
173 ground under liquid nitrogen, and RNA was extracted from <100mg ground tissue using  
174 the Qiagen Plant RNeasy kit. RNA quality/quantity was checked via Nanodrop (Thermo  
175 Fisher Scientific); qualified samples of >50ng/uL with 260/280 and 260/230 between 1.8-  
176 2.0 were brought to the IU Center for Genomics and Bioinformatics (CGB) for library  
177 preparation. Separate reproductive and vegetative libraries for RNA-seq were prepared  
178 by pooling equi-molar RNA samples from all reproductive tissues, and all vegetative  
179 tissues, respectively, for each species. Both reproductive and vegetative libraries were  
180 prepared for all species except for *J. grandibaccata*, for which only vegetative RNA  
181 could be obtained.

182 Libraries were sequenced using 100-bp paired-end reads in a single lane of  
183 Illumina Hi-seq 2000 (San Diego, CA, USA). Raw paired-end reads were filtered for  
184 quality using the program Shear (<https://github.com/jbpease/shear>) by removing low

185 quality reads and ambiguous bases, and trimming adapter ends (see Supplementary text).  
186 The retained reads (length >50 bps) from vegetative and reproductive transcriptomes of  
187 the same species were combined prior to assembly using Trinity with the default settings  
188 (Grabherr et al., 2011). The open reading frame of each assembled transcript was  
189 predicted using TransDecoder v.2.0.1 with default settings (Haas et al., 2013). All the  
190 predicted protein-coding sequences within each *Jaltomata* species transcriptome were  
191 reduced using CD-HIT v4.6 with -c 0.99 -n 10 (Fu et al., 2012). Each sequence in the  
192 assembled transcriptome was presented as a haploid representative of particular transcript.  
193 To include domestic tomato (*Solanum lycopersicum*) as the outgroup in the following  
194 analyses, we also downloaded the annotated tomato protein-coding sequences from  
195 SolGenomics (<ftp://ftp.solgenomic.net>).

196

#### 197 Protein-coding gene ortholog identification

198 To infer orthologous gene clusters, we followed a pipeline designed for  
199 transcriptome data in non-model species, that begins with an all-by-all BLAST search  
200 followed by several steps that iteratively split sub-clusters of homologs at long internal  
201 branches, until the subtree with the highest number of non-repeating/non-redundant taxa  
202 is obtained (Yang et al., 2015; Yang & Smith, 2014) (see Supplementary text, Figure S1).  
203 For the primary analyses, our homologous clusters were required to include a *S.*  
204 *lycopersicum* (tomato) homolog in each cluster. For one of our downstream analyses  
205 (molecular evolution on the basal branch leading to *Jaltomata*; see below) we also used  
206 *Capsicum annuum* (pepper) sequence data. To do so, we added the *C. annuum* sequences  
207 if the tomato sequence in the orthologous cluster had an identified 1-to-1 ortholog in a

208 pepper gene model (<http://peppersequence.genomics.cn>).

209 We prepared multiple sequence alignments of orthologous genes using the  
210 program GUIDANCE v.2.0 (Sela et al., 2015) with PRANK v.150803 (Löytynoja &  
211 Goldman, 2005) as the alignment algorithm, with codons enforced and ten bootstrap  
212 replicates. As a final quality check, we further removed poorly aligned regions using a  
213 sliding window approach that masked any 15-bp window from alignment if it had more  
214 than three mismatches (indels/gaps were not counted) between ingroup sequences, or  
215 had more than five/seven mismatches when tomato/pepper sequences were included.  
216 After this process, any alignment with more than 20% of its sequence masked was  
217 removed from the analysis. The resulting sequence alignments were converted to the  
218 Multisample Variant Format (MVF), and then genetic distances were computed in all  
219 possible pairs of species using the program MVFtools (Pease & Rosenzweig, 2015).

220

### 221 Estimating the amount of shared variation

222 To quantify the amount of variation shared among species and subclades in  
223 *Jaltomata*, the reads from all 14 species were mapped to the reference tomato genome  
224 (The Tomato Genome Consortium, 2012) using STAR v2.5.2 (Dobin et al., 2013). SAM  
225 files generated were converted to sorted BAM files using SAMtools v. 0.1.19 (Li et al.,  
226 2009). SAMtools *mpileup* was then used to call alleles from the BAM files for all  
227 lineages. VCF files were processed into MVF files using *vcf2mvf* from the MVFtools  
228 package (Pease & Rosenzweig, 2015), requiring non-reference allele calls to have Phred  
229 scores  $\geq 30$  and mapped read coverage  $\geq 10$ . Based on the MVF files, the numbers of  
230 variant sites shared between different subclades of *Jaltomata* species were counted.

231

232 *Phylogenetic analysis*

233 We used four different, but complementary, inference approaches to perform  
234 phylogenetic reconstruction: 1) maximum likelihood applied to concatenated alignments;  
235 2) consensus of gene trees; 3) quartet-based gene tree reconciliation; and 4) Bayesian  
236 concordance of gene trees. Because these four approaches use different methods to  
237 generate a phylogeny, we applied all four to evaluate the extent to which they generated  
238 phylogenies that disagreed, as well as to identify the specific nodes and branches that  
239 were robust to all methods of phylogenetic reconstruction. For the concatenation  
240 approach, we first aligned all orthologous genes (n=6431), and then used those  
241 alignments to build a supermatrix of sequences (6,223,350 sites in total). The species tree  
242 was then inferred by maximum likelihood using the GTRCAT model in RAxML v8.23  
243 with 100 bootstraps (Stamatakis, 2006). We also inferred chromosome-concatenated  
244 phylogenies with this method. The other three methods (i.e. consensus, quartet-based, and  
245 Bayesian concordance) infer species relationships based on gene trees. First, we inferred  
246 the majority rule consensus tree with internode certainty (IC) and internode certainty all  
247 (ICA) support scores using RAxML with the option for Majority Rule Extended  
248 (Salichos & Rokas, 2013). Second, we inferred a quartet-based estimation of the species  
249 tree by using the program ASTRAL v.4.10.9 with 100 bootstraps (Mirarab & Warnow,  
250 2015). All 6431 RAxML gene trees were used as input in the consensus and quartet-  
251 based approaches. Finally, the Bayesian primary concordance tree and associated  
252 concordance factors (CFs; indicative of the posterior probability of gene trees supporting  
253 a node) at each internode of the primary concordance tree was computed in the program

254 BUCKy v1.4.4 (Larget et al., 2010). Because BUCKy is computationally intensive for a  
255 large number of input gene trees, we only used orthologous gene sets that were  
256 potentially informative for resolving gene trees in these analyses. Specifically, we utilized  
257 1517 genes that showed average bootstrap values >50 across the RAxML-inferred gene  
258 trees. (These are generally the loci with sufficient genetic variation across the tree to  
259 provide information about branch support.) The input of a posterior distribution of gene  
260 trees was generated from an analysis with MrBayes v3.2 (Huelsenbeck & Ronquist,  
261 2001). We ran MrBayes for one million Markov chain Monte Carlo (MCMC) generations,  
262 and every 1000th tree was sampled. After discarding the first half of the 1000 resulting  
263 trees from MrBayes as burnin, BUCKy was performed for one million generations with  
264 the default prior probability that two randomly sampled gene trees share the same tree  
265 topology is 50% ( $\alpha = 1$ ) (Larget et al., 2010).

266 All inferred species trees were plotted using the R package “phytools” (Revell, 2012).  
267 To estimate dates of divergence, we used the function “chronos” in the R package “ape”  
268 (Paradis et al., 2004) to fit a chronogram to the RAxML genome-wide concatenated  
269 phylogeny by using penalized likelihood and maximum likelihood methods implemented  
270 in chronos. Times were calibrated using a previous estimate of the divergence time  
271 between *Solanum* and *Jaltomata* at ~17 Ma (Särkinen et al., 2013). To visualize gene tree  
272 discordance, a “cloudogram” of 183 gene trees with average node bootstrap values  
273 greater than 70 was prepared using DensiTree v 2.2.1 (Bouckaert, 2010).

274

#### 275 Ancestral state reconstruction

276 The number of sampled species (14) is small compared to the size of this clade (60-  
277 80 species), and sparse taxon sampling is known to affect the reconstruction of ancestral

278 character states (Heath et al., 2008). Nonetheless, to assess whether our confidence in the  
279 number and placement of transitions generally differs among different traits in our clade,  
280 we reconstructed ancestral states for fruit color, nectar color, nectar volume and corolla  
281 shape. We used the ultrametric species tree inferred from the RAxML genome-wide  
282 concatenated phylogeny and the distribution of traits at the tips of phylogeny (Figure 2A)  
283 as input. While nectar volume is a quantitative trait, the other three traits are categorical  
284 (fruit color: purple/red/orange/green; nectar color: red/clear; corolla shape:  
285 rotate/campanulate/tubular). Ancestral character states were inferred using the standard  
286 maximum likelihood method with the equal rates model “ER” within the phytools  
287 package (Revell, 2012), which models the evolution of discrete-valued traits using a  
288 Markov chain, and the evolution of continuous-valued traits using Brownian motion.

289

### 290 Testing for introgression

291 We searched for evidence of post-speciation gene flow, or introgression, using the  
292 ABBA-BABA test (Durand et al., 2011; Green et al., 2010) on the concatenated  
293 orthologous sequence alignment (n=6431 and 6,223,350 sites in total). The ABBA-  
294 BABA test detects introgression by comparing the frequency of alternate ancestral (“A”)  
295 and derived (“B”) allele patterns among four taxa. In the absence of gene flow, the  
296 alternate patterns ABBA and BABA should be approximately equally frequent, given the  
297 equal chance of either coalescence pattern under incomplete lineage sorting (ILS). An  
298 excess of either ABBA or BABA patterns is indicative of gene flow. Because of the low  
299 resolution of many recent branches within major clades of the phylogenetic tree (see  
300 Results), evidence for introgression was only evaluated between four well-supported

301 major subclades, each of which is characterized by a distinct fruit color in our specific  
302 dataset (i.e. the purple-, red-, and orange-fruited major clades, and a two-species clade of  
303 green-fruited taxa; see Results). Patterson's  $D$ -statistic was calculated for all four-taxon  
304 combinations including one taxon from the green-fruit lineage, one from red or orange-  
305 fruit lineage, one from purple-fruit lineages, and one from tomato as the outgroup.  
306 Patterson's  $D$ -statistic is calculated as  $(ABBA-BABA) / (ABBA+BABA)$  for biallelic  
307 sites in the multiple sequence alignment (Durand et al., 2011; Green et al., 2010). To  
308 further investigate the taxa involved in and the direction of introgression specifically  
309 involving purple-fruited lineages, we also used a symmetric five-taxon phylogeny  
310 method 'D-foil' test (Pease & Hahn, 2015) on the transcriptome-wide concatenated  
311 dataset, however the results of these analyses were inconclusive (see Supplementary text).

312

### 313 Identifying genetic variation associated with trait evolution

314 We used two general strategies to identify loci that might contribute to important  
315 phenotypic trait (fruit and floral) transitions within *Jaltomata*. First, to identify loci that  
316 have experienced lineage-specific *de novo* adaptive molecular evolution, we evaluated  
317 loci for patterns of molecular evolution indicative of positive selection on specific  
318 phylogenetic branches (i.e.  $d_N/d_S > 1$ ). Second, to identify variants that might have been  
319 selected from segregating ancestral variation, we identified genetic variants that had  
320 polyphyletic topologies that grouped lineages according to shared trait variation rather  
321 than phylogenetic relationships ('PhyloGWAS'; Pease et al., 2016).

322

323 *1) Lineage-specific de novo evolution associated with trait variation:* We identified loci

324 with signatures of *de novo* adaptive molecular evolution (i.e. significantly elevated rates  
325 of non-synonymous substitution) across each available locus in our transcriptome  
326 (sometimes called ‘reverse ecology’; Li et al., 2008) as well as in a set of *a priori*  
327 candidate loci identified based on known or putative functional roles associated with  
328 floral or fruit trait variation (Krizek & Anderson, 2013; Rausher, 2008; Specht &  
329 Howarth, 2015) (see supplementary text). Tests were only performed on the four best-  
330 supported branches within the phylogeny (see Results). For each locus (group of  
331 orthologs), we inferred putative adaptive evolution (i.e.  $d_N/d_S > 1$ ) using PAML v4.4  
332 branch-site model (model = 2 and NS sites = 2) on the target branches (Yang, 2007). In  
333 each analysis, a likelihood ratio test (LRT) was used to determine whether the alternative  
334 test model (fixed\_omega = 0) was significantly better than the null model (fixed\_omega  
335 = 1). In addition, because PAML uses a tree-based  $d_N/d_S$  model to reconstruct ancestral  
336 states and lineage-specific substitutions, and because high levels of incongruence of gene  
337 trees caused by ILS and introgression can produce misleading results when gene trees do  
338 not match the assumed species tree (Mendes et al., 2016; Pease et al., 2016), we limited  
339 our tests of molecular evolution to the subset of genes for which 1) the RAxML gene tree  
340 contained the target ancestral branch (that is, the target branch was supported by the  
341 genealogy of the tested/target locus); and 2) there was at least one non-synonymous  
342 substitution that could be unambiguously assigned to this branch.

343         Prior to testing individual loci, we further filtered our data to ensure that poorly  
344 aligned and/or error-rich regions were excluded from our alignments (as these tests are  
345 particularly sensitive to alignment errors that generate spurious non-synonymous  
346 changes). To do so, we used the program SWAMP v1.0 to remove regions from



347 alignments when they showed higher than expected non-synonymous substitutions (i.e.  
348 more than five non-synonymous substitutions in 15 codons; the second sliding-window  
349 sequence alignment check, different from above) and a minimum sequence length of 50  
350 codons (Harrison et al., 2014). We also required that each alignment must contain a  
351 tomato sequence and orthologous sequences from all investigated *Jaltomata* species  
352 (except for *J. grandibaccata* because reproductive tissues were not sampled from this  
353 species). The resulting sequence alignments were converted to codon-based MVF file  
354 format (Pease & Rosenzweig, 2015), prior to performing branch-site tests. We first  
355 defined putative genes showing positive selection by using the uncorrected  $p$ -value  $<0.01$   
356 as cutoff. The false discovery rate (FDR; (Benjamini & Hochberg, 1995) was then  
357 calculated for the PAML  $p$ -values in each branch-specific test.

358 For the PAML analyses of *a priori* candidates, we used a slightly less stringent  
359 statistical cutoff for consideration and required only that each cluster of orthologous  
360 sequences had a minimum representation of species from each of the major clades (see  
361 supplementary text); this allowed us to evaluate more of these loci while still testing  
362 molecular evolution only on the four well-supported branches. For *a priori* genes  
363 showing a significant signature of positive selection ( $p <0.05$ ) and for genes identified by  
364 the genome-wide unbiased analyses (FDR  $<0.1$ ), we manually checked the sequence  
365 alignments to examine whether they contain putative multi-nucleotide mutations  
366 (MNM), which can cause false inferences of positive selection in the PAML branch-site  
367 test (Venkat et al., 2017). Here we assigned an MNM in cases where we observed that a  
368 single codon had 2 or 3 substitutions on the selected branch.

369 To determine the putative functional categories of genes with elevated per site

370 non-synonymous substitution rates, and to assess whether these were enriched for  
371 particular functional categories, genes with uncorrected  $p$ -value  $<0.05$  from the  
372 transcriptome-wide analysis were also examined using Gene Ontology (GO) terms. GO  
373 term reference was obtained from the Gene Ontology project ([www.geneontology.org](http://www.geneontology.org)).  
374 GO terms for each gene were obtained from SolGenomics (<ftp://www.solgenomics.net>).  
375 GO term enrichment analysis was performed with ONTOLOGIZER v2.0 using the  
376 parent-child analysis (Bauer et al., 2008).

377

378 2) *Ancestral genetic variation associated with trait variation*: To identify shared ancestral  
379 variants that were associated with trait variation across lineages, we used a ‘PhyloGWAS’  
380 approach (Pease et al., 2016) in which we searched for SNPs that were shared by current  
381 accessions that share the same character state, regardless of their phylogenetic relatedness.  
382 This approach is only informative in cases where trait variation is not confounded with  
383 phylogenetic relationships, which in *Jaltomata* applies to floral shape transitions from the  
384 ancestral ‘rotate’ form to the two derived forms (see Results). For our analysis, we treated  
385 both campanulate and tubular corolla as the derived state, and rotate corolla as the  
386 ancestral state (Figure S2). These categories of floral shape are also perfectly associated  
387 with nectar color variation; species with rotate corollas have small amounts of clear/very  
388 lightly colored nectar (ancestral), whereas species with campanulate or tubular corollas  
389 have larger amounts of darkly colored red or orange nectar (derived). To assess whether  
390 the number of nonsynonymous variants found to be associated with our defined groups of  
391 floral traits (see Results) was greater than expected by chance, we generated a null  
392 distribution due to ILS alone by simulating datasets over the species tree (Figure 2A)

393 using the program *ms* (Hudson, 2002). An associated *p* value was determined by the  
394 proportion of simulated datasets that have a greater number of genes perfectly associated  
395 with the floral trait distribution than our observed value (see Supplementary text).

396

## 397 **RESULTS**

### 398 *Transcriptome assembly and ortholog inference identified >6000 orthologs*

399 In assembled transcriptomes from both reproductive and vegetative tissues for  
400 each of 14 *Jaltomata* species (except for *J. grandibaccata*, which only included  
401 vegetative tissues), the number of transcripts per lineage ranged from 46,841-132,050,  
402 and mean transcript length ranged from 736-925 bp (Table S2). Based on our criteria for  
403 ortholog identification (see Methods, Figure S1), we ultimately identified 6431 one-to-  
404 one orthologous genes for which we had sequences from all 14 investigated *Jaltomata*  
405 species and a unique tomato annotated coding sequence. All of these 6431 genes were  
406 used in the concatenation, majority rule, or quartet-based phylogeny reconstructions.  
407 From this dataset, we used 1517 genes in the BUCKy reconstruction (see Methods).  
408 Since we did not sample RNA from the reproductive tissues of *J. grandibaccata*, we  
409 excluded this species from analyses of locus-specific adaptive evolution; this resulted in a  
410 slightly larger number of orthologs, including those expressed solely in flowers. The  
411 resulting dataset had 6765 alignments of orthologous coding sequences, each containing  
412 sequences from the remaining 13 *Jaltomata* species (with *J. grandibaccata* excluded) and  
413 tomato. Among them, 4248 genes also have *C. annuum* orthologs, thus could also be used  
414 to test for positive selection on the ancestral branch leading to *Jaltomata*.

415

416 *Phylogenomic reconstruction of Jaltomata lineages supports several major clades*

417 All four phylogenetic inference methods (concatenation, majority rule, quartet-  
418 based, and Bayesian concordance) generated a nearly identical species tree topology  
419 (Figure 2A, S3). In all trees, the first split in the species tree produces a well-supported  
420 clade that includes three north- and central-American species (*J. procumbens*, *J.*  
421 *repandidentata*, and *J. darciana*) that all share floral traits (rotate corollas and light  
422 nectar) and make dark purple/purple fruit (CF=87). The remaining 11 species, that are  
423 found exclusively in South America and vary in floral traits and fruit colors, form a single  
424 moderately supported clade (CF=66). Based on sequence divergence at synonymous sites  
425 (Table S3), lineages within the non-purple-fruited clade have pairwise distance of 0.26%  
426 to 0.53%, and differ from the purple-fruited lineages by 0.95% to 1.29%. Within the non-  
427 purple-fruited group, our reconstruction indicates that the red-fruited species *J. auriculata*  
428 is sister to the remaining species. The remaining species are split into a moderately  
429 supported clade (CF=67) of two species (*J. calliantha* and *J. quipuscoae*) that share floral  
430 traits and green fruits, and a relatively poorly supported clade (CF=19) consisting of the  
431 remaining eight species that vary extensively in floral traits but all produce orange fruit.  
432 Although quantitative support for different clades varied based on inference method  
433 (Figure S3), all trees produced the same topology, with the exception of inferred  
434 relationships within the orange-fruited group among *J. biflora*, *J. sinuosa*, *J. aijana* and *J.*  
435 *umbellata*. In that case, all concatenation, quartet-based, and concordance trees supported  
436 *J. sinuosa* as more closely related to *J. aijana* and *J. umbellata* (6% of gene trees support  
437 this grouping), while consensus trees placed *J. sinuosa* as sister to *J. biflora* (7% of gene  
438 trees support this grouping).

439

440 *Segregating variation is broadly shared among species in different subclades*

441 To quantify how much variation shared among present subclades—presumably  
442 because of either shared ancestral variation or ongoing introgression—we mapped RNA-  
443 seq reads from each species to the tomato reference genome and called high-quality  
444 variants from ~8 million sites with more than 10X sequencing depth for all investigated  
445 species. We identified a large number of sites that are sorting the same allele among  
446 different subclades. Among them, 4303 variant sites are sorting in all four subclades  
447 (Figure 3A). We also quantified how many sites that are heterozygous in one lineage  
448 (accession) have the same two alleles sorting in other subclades. Within each lineage, the  
449 proportion of heterozygous sites range from 0.02%~0.16% (Table S4), which is  
450 comparable to the level of heterozygosity observed in self-compatible tomato species  
451 (Pease et al., 2016). For 13.57% to 64.35% of heterozygous sites in one species (Figure  
452 3A, Table S4), both alleles could also be identified in other subclades, again indicative of  
453 a large amount of shared allelic variation.

454

455 *Phylogenomic discordance accompanies rapid diversification*

456 As expected given the large number of genes ( $n=6431$  and 6,223,350 sites in  
457 total) used for phylogenetic inference, our resulting species trees had very strong  
458 bootstrap support for almost all nodes (Figure S3A and S3C). Despite this,  
459 reconstructions also revealed evidence of extensive gene tree discordance consistent with  
460 rapid consecutive lineage-splitting events in this group (Figure 2B; S3B and S3D). For  
461 instance, the 6431 genes inferred 6431 different topologies, none of which matched the

462 topology of the inferred species tree (Figure 2A). The concatenation tree has many  
463 extremely short internal branches, where gene trees show high levels of phylogenetic  
464 discordance. We detected a strong correlation between the internal branch length and  
465 levels of discordance ( $P = 0.0001$ , Figure S4), consistent with both ILS and introgression.  
466 Short branch lengths and extensive discordance were also detected for trees built  
467 individually for each of the 12 chromosomes (Figure S5; supplementary text).

468 Only three branches within *Jaltomata* are supported with relatively little  
469 discordance, i.e., with Bayesian CFs greater than 50 (Figure S3D): the branch leading to  
470 the purple-fruited clade, the branch uniting all non-purple-fruit *Jaltomata* lineages, and  
471 the branch leading to the two green-fruited lineages (Figure 2A). Along with the ancestral  
472 *Jaltomata* branch, these were the four branches on which most of our subsequent  
473 analyses were performed.

474

#### 475 *Introgression after speciation among major clades of Jaltomata lineages*

476 Given the apparent high level of phylogenetic discordance among our examined  
477 species, we tested for evidence of introgression on the background of presumed ILS. To  
478 do so, we calculated genome-wide  $D$ -statistics using the ABBA-BABA test. We only  
479 examined introgressions across well-supported subclades. In particular, we compared the  
480 distribution of trees in which one of two sister taxa (here, a species from either the red-,  
481 green-, or orange-fruited lineage) is closer to more distantly related species (in the purple-  
482 fruited clade) than the other. We found several such cases (Figure 3B). For example,  
483 there was a significant excess of sites that grouped the red-fruited lineage (*J. auriculata*)  
484 with a purple-fruited lineage, relative to the number of sites that grouped the green-

485 fruited lineage with the purple-fruited lineage, indicative of detectable gene flow between  
486 the red-fruited and purple-fruited lineages since their split (Figure 3B and Table S5). We  
487 also inferred putative introgression, in at least two separate events, involving six species  
488 in the orange-fruited clade with the purple-fruited clade (Figure 3B and Table S5). First,  
489 we inferred a shared introgression event between the purple-fruited group and three of the  
490 orange-fruited species (*J. grandibaccata*, *J. dendroidea*, and *J. incahuasina*); this excess  
491 includes shared specific sites that support the same alternative tree topology for each of  
492 these three ingroup species, suggesting that it likely involved the common ancestor of all  
493 three contemporary orange-fruited species (Table S6). Second, we detected evidence for  
494 gene flow between the remaining orange-fruited species (*J. yungayensis*, *J. biflora* and *J.*  
495 *sinuosa*) and the purple-fruited lineage, in the form of significant genome-wide *D*-  
496 statistics (Table S5). Because we did not observe an excess of shared specific sites  
497 supporting the same alternative tree topology among these three orange-fruited species  
498 (Table S6), these patterns are suggestive of three putative independent introgression  
499 events. However, given very low resolution of patterns of relatedness among orange-  
500 fruited species, the specific timing of these events is hard to resolve.

501

502 Ancestral state reconstruction suggests different histories for fruit color and floral trait  
503 evolution

504 Based on the inferred species tree (Figure 2A), we reconstructed the ancestral  
505 states of fruit and floral traits (Figure 4; S6). The four subclades of *Jaltomata* species  
506 were inferred to have evolved different fruit colors at their corresponding common  
507 ancestors (Figure 4A). Our reconstruction suggests that the derived nectar traits

508 (orange/red nectar color, and increased nectar volume) probably evolved at the common  
509 ancestor of the green/orange-fruited clade (Figure S6A and S6B), with two subsequent  
510 reversions to ancestral conditions within this clade. The evolution of the two derived  
511 corolla shapes in *Jaltomata* (campanulate and tubular) appears to be more complex  
512 (Figure 4B). At the majority of internodes within the non-purple-fruited lineages, all three  
513 corolla shapes (i.e. rotate (ancestral), campanulate and tubular) show  $\geq 10\%$  probability of  
514 being the ancestral state, making specific inferences about corolla shape evolution within  
515 this clade uncertain. Consistent with these patterns, we found that concordance factors  
516 were very low at almost all internodes within the radiating subgroup that displays the  
517 derived floral traits (i.e., the non-purple-fruited lineages) (Figure 2A; S3D), whereas they  
518 were considerably higher on branches associated with fruit color evolution (including the  
519 branch uniting the two green-fruited species analyzed).

520         These analyses suggest alternative evolutionary and genetic histories for our traits  
521 of interest. In particular, strong associations between fruit color transitions and specific  
522 branches/clades within *Jaltomata* suggests that the underlying genetic changes are more  
523 likely due to conventional lineage-specific *de novo* evolution along the relevant branches.  
524 In contrast, the distribution of floral trait variation produces an ambiguous reconstruction  
525 of trait transitions, especially for floral shape, such that the distribution of ancestral  
526 versus derived floral shape variation is unassociated with phylogenetic relationships in  
527 the non-purple-fruited *Jaltomata* clade (Figure 4B). While strictly *de novo* evolution  
528 occurring multiple times is not excluded as an explanation of floral evolutionary  
529 transitions, one alternative is that these trait transitions drew upon shared variation  
530 segregating in the ancestor of these lineages. Accordingly, in the next sections we



531 evaluate both lineage-specific *de novo* evolution and selection from standing ancestral  
532 variation when searching for genetic variants that might have contributed to floral trait  
533 evolution. The lineage-specific *de novo* evolution analysis alone is used to identify  
534 potential candidates for fruit color evolution, since the approach we use to identify  
535 standing ancestral variation is only informative in cases where trait variation is not  
536 confounded with phylogenetic relationship.

537

538 *Loci with patterns of positive selection associated with lineage-specific trait evolution*

539 We performed tests of molecular evolution for all orthologous clusters that  
540 contained a sequence from every *Jaltomata* accession and an ortholog from the tomato  
541 outgroup. Depending upon the specific branch being tested, we detected evidence for  
542 positive selection in ~1-2% of loci in our dataset, based on whether the locus had  
543 significantly elevated  $d_N/d_S$  ratios ( $d_N/d_S > 1$ ;  $p < 0.01$ ). This included 1.88% of genes (67  
544 out of 3556 testable genes; Table S7) on the *Jaltomata* ancestral branch, 1.58% in the  
545 purple-fruited group (48 out of 3033 testable genes; Table S8), 2.61% in the red-fruited  
546 group (70 out of 2686 testable genes; Table S9), 1.96% in the green-fruited group (30 out  
547 of 1531 testable genes; Table S10), and 0.74% in the non-purple-fruited *Jaltomata*  
548 lineages (15 out of 2039 testable genes; Table S11). Many of the genes showing elevated  
549  $d_N/d_S$  appear to have general molecular functions (e.g. transcription, protein synthesis, or  
550 signaling), including numerous genes involved in various stress responses, such as heavy  
551 metal tolerance, sugar starvation response, protection from ultraviolet (UV) radiation and  
552 extreme temperature, and herbivore and pathogen resistance (Table S7-11). Our  
553 positively selected loci contain genes functionally associated with photosynthesis,

554 fatty/lipid biosynthesis and transportation, and sugar signal transduction (observed in the  
555 GO enrichment analysis; Table S12-16), as well as loci with unknown functions.

556         After controlling for multiple tests using an FDR <0.1 on each branch tested, only  
557 three genes on the *Jaltomata* ancestral branch, one gene on the purple-fruited ancestral  
558 branch, and four genes on the red ancestral branch, remained significant for  $d_N/d_S > 1$ .  
559 Interestingly, for 5 of these 8 loci, the inference of positive selection appears to be due to  
560 the presence of a multi-nucleotide mutation (MNM) specifically on the target branch, a  
561 mutational pattern known to produce spurious inferences of positive selection in PAML's  
562 branch-site test (Venkat et al., 2017). With one exception, all of these potential false  
563 positives were found on the ancestral *Jaltomata* or purple-fruited clade branches, the  
564 longest *Jaltomata*-specific branches in our analyses; as MNMs are more likely to appear  
565 on long branches (they are relatively rare mutations) these are expected to be enriched for  
566 these spurious inferences in the branch-site test (Venkat et al., 2017). Our three remaining  
567 loci, with positive selection on the red-fruited branch, include a gene (*BANYULS*;  
568 ortholog to *Solyc03g031470*) with functional roles in pigmentation (see Discussion).

569         We also detected several instances where slightly less stringent criteria ( $d_N/d_S > 1$ ;  
570  $p < 0.05$ ) revealed lineage-specific adaptive evolution of our *a priori* candidate genes  
571 occurring on a branch that is also inferred to be associated with the evolution of derived  
572 traits (Table S17). Most notably, we found evidence of positive selection on candidate  
573 loci that are likely to be involved in fruit color, including a gene encoding  $\zeta$ -carotene  
574 isomerase (*Z-ISO*; ortholog to *Solyc12g098710*) on the red-fruited lineage, and the two  
575 other genes significant on the ancestral branch of the green-fruited lineages encoding  
576 carotenoid cleavage enzyme 1A (*CCDIA*; ortholog to *Solyc01g087250*) and zeaxanthin

577 epoxidase (*ZEP*; ortholog to *Solyc02g090890*) (Figure 5, see Discussion). We detected  
578 signatures of positive selection on fewer of the genes involved in floral development,  
579 mostly notably in the MADS-box gene *APETALA3* (*AP3/DEF*, ortholog to  
580 *Solyc04g081000*) on the ancestral branch to the purple-fruited lineage. Overall, we note  
581 that many of our loci (including *a priori* candidates) did not meet the requirements to be  
582 tested for positive selection (Table S7); in particular, gene trees for many loci lacked the  
583 required support for a specific internal branch, either because of incongruence or limited  
584 phylogenetic signal, especially within the rapidly diverging orange-fruited clade (Table  
585 S17).

586

587 *Loci potentially associated with trait evolution from standing ancestral variation*

588 To investigate whether ancestral variants are potentially associated with floral  
589 trait diversification, we performed a “PhyloGWAS” analysis (Pease et al., 2016). Such  
590 variants will have differentially fixed among descendant lineages, leading to genes that  
591 cluster species together based on floral traits regardless of their overall phylogenetic  
592 relationships. We found 31 genes with nonsynonymous variants perfectly associated with  
593 the derived floral traits (Table S18), which was significantly more than the number of  
594 loci expected by chance to have segregation patterns that exactly match the tip states ( $p <$   
595  $9.3 \times 10^{-5}$ ). Most of these genes are characterized by only one or few nucleotide  
596 differences, which is an expected pattern for variants recently selected from standing  
597 ancestral variation (Pease et al., 2016). These results suggest that one or few molecular  
598 variants present in ancestral populations could contribute to the multiple apparent  
599 transitions to derived floral shapes in *Jaltomata*. Among the loci identified by our

600 approach, some genes are potentially functionally related to petal development, including  
601 *ARGONAUTE1* (*AGO1*) and xyloglucan endotransglucosylase/hydrolase 2 (*DcXTH2*)  
602 (see Discussion).

603

## 604 **DISCUSSION**

605       Within rapidly radiating groups, the patterns of genetic relatedness among  
606 lineages provide essential data for determining the pace and location of important trait  
607 transitions, and their underlying genes; both are critical for understanding the drivers of  
608 rapid diversification and speciation. Our phylogenomic analyses of the 14 investigated  
609 *Jaltomata* species revealed genome-wide gene tree discordance, and a highly complex  
610 history of genetic relatedness among contemporary lineages, consistent with other studies  
611 of recently radiating groups (Brawand et al., 2014; Garrigan et al., 2012; Novikova et al.,  
612 2016; Pease et al., 2016). We identified substantial ILS and shared ancestral  
613 polymorphism, as well as evidence of putative introgressions among the subclades of  
614 *Jaltomata* species, as the sources of this observed complex genome-wide history. This  
615 complexity was also reflected in inferences about the evolution of major trait transitions  
616 within the group. We found differences in the patterns of fruit versus floral character  
617 evolution and in our inferred confidence in the reconstruction of these patterns, including  
618 their likely risk of hemiplasy. Given this, we used several strategies to identify loci that  
619 might contribute to the evolution of these traits, including examining lineage-specific *de*  
620 *novo* adaptive evolution along well-supported branches and identifying variants that  
621 might have been selected from standing ancestral variation. Overall, by combining  
622 evidence from molecular evolution with data on trait variation across a clade—and a

623 more direct accounting for the risk of hemiplasy—we generated more conservative, but  
624 credible, inferences of candidate genes responsible for the evolution of ecologically  
625 important phenotypic traits. Specifically, we identified several functionally relevant  
626 candidate genes for our target trait transitions, and different potential sources of adaptive  
627 evolution fueling changes in target floral versus fruit traits.

628

629 *Extensive ILS and several introgression events produce a complex genome-wide history*  
630 *during rapid diversification*

631 Our reconstruction of phylogenetic relationships based on a transcriptome-wide  
632 dataset agrees with previous studies that identified three major *Jaltomata* sub-clades  
633 primarily distinguished from each other by their fruit colors (Miller et al., 2011; Särkinen  
634 et al., 2013), including the previous inference that the clade of purple-fruited species is  
635 sister to the rest of the genus (Särkinen et al., 2013). However, the relationships among  
636 species within each subclade show high levels of discordance, and the distribution of  
637 genetic variation strongly indicates a rapid and recent evolutionary origin; the internal  
638 branch lengths within each subclade are short, especially in the non-purple-fruited  
639 lineages (Figure 2A). Accordingly, the history of these species—including the  
640 orange/green-fruited lineages that show the most floral trait diversity among *Jaltomata*  
641 species—is expected to be strongly affected by ILS and introgression.

642 Indeed our genome-wide reconstruction indicated that, although concatenation or  
643 quartet-based approaches generated a species tree with high bootstrap support values  
644 (commonly observed when inferring trees from large amounts of data (Kubatko &  
645 Degnan, 2007; Salichos & Rokas, 2013), gene tree discordance was rampant, and

646 individual gene trees showed highly variable support for the specific placement of  
647 individual species (Figure 2B) especially at short branches (Figure 2A). Our finding of  
648 extensive genome-wide ILS in the genus *Jaltomata* agrees with other recent studies on  
649 contemporary (Novikova et al., 2016; Pease et al., 2016) and relatively ancient adaptive  
650 radiations in plant species (Wickett et al., 2014; Yang et al., 2015), and is emerging as a  
651 universal signal of rapid radiation in comparative genome-wide datasets.

652 Resolution of phylogenetic relationships among the species within each *Jaltomata*  
653 subclade was insufficiently clear to investigate introgression within subgroups. However,  
654 across major sub-clades we identified at least two clear introgression events that involved  
655 either orange and red-fruited lineages with the purple-fruited lineages, similar to the  
656 detection of introgression events in other recent genome-wide studies on closely related  
657 plant species (Eaton & Ree, 2013; Novikova et al., 2016; Owens et al., 2016; Pease et al.,  
658 2016). Interestingly, in one case an excess of sites supported a shared introgression  
659 pattern between three orange-fruited species (i.e. *J. grandibaccata*, *J. dendroidea*, and *J.*  
660 *incahuasina*) and the purple-fruited clade, consistent with a scenario in which  
661 introgression involved the recent common ancestor of these three orange-fruited species.  
662 Moreover, in this case, the inference of a single shared introgression event itself provided  
663 more confidence in this specific ancestral branch within the orange-fruited clade. Overall,  
664 as with ILS, post-speciation introgression is another inference frequently emerging from  
665 contemporary phylogenomic studies of radiations.

666

667 *Inferring the history of trait evolution and the contributing loci in the presence of*  
668 *rampant discordance*

669           The complex history of genomic divergence in this clade has clear consequences  
670 for inferences of trait and gene evolution. When ILS or introgression can plausibly  
671 explain the discordant distribution of traits, it might be impossible to infer trait evolution  
672 with any certainty in the absence of additional independent information about target traits,  
673 such as their genetic basis (Hahn & Nakhleh, 2016). In contrast, the evolutionary  
674 transitions of some traits might be confidently inferred as long as the relevant branches  
675 and resulting relationships are associated with higher levels of concordance (Hahn &  
676 Nakhleh, 2016). Species in *Jaltomata* exhibit extensive trait diversity, most notably in  
677 fruit color, corolla shape, and nectar volume and color (Figure 2A) (Miller et al., 2011),  
678 and one of the main goals in this study was to better understand the evolutionary history  
679 of these trait transitions, including the genetic basis of the traits associated with rapid  
680 phenotypic diversification. A previous phylogenetic study based on a single locus  
681 suggested that floral traits (including corolla shape and nectar color) might have evolved  
682 multiple times independently in *Jaltomata* species (Miller et al., 2011). However, the  
683 presence of rampant discordance, and abundant evidence of shared ancestral variation,  
684 makes inferring the history of trait transitions and their genetic basis especially  
685 challenging in this group. Indeed, our analyses indicated that different classes of trait  
686 transition—most notably fruit color versus floral shape variation—were differently  
687 susceptible to hemiplasy. For floral shape evolution in *Jaltomata*, a lack of resolution and  
688 high gene tree discordance at key nodes within the phylogeny, including within the clade  
689 displaying the greatest phenotypic diversity (Figure 2A and Figure 4B), mean that  
690 hemiplasy is a plausible explanation of the discordant distribution of similar floral  
691 traits—rather than multiple independent evolutionary events (i.e. homoplasy). In contrast,

692 we showed that the history of fruit color evolution could be confidently inferred, as these  
693 trait transitions occurred on branches with higher levels of concordance and therefore  
694 lower risks of hemiplasy (Figure 2A and Figure 4A).

695 Accounting for the potential influence of hemiplasy is also critical when  
696 generating hypotheses about the loci that could have contributed to trait transitions. In  
697 general, incorrect reconstructions of trait history will suggest incorrect candidates  
698 involved in the evolution of those traits. Moreover, tests of molecular evolution can be  
699 specifically misled if trait transitions occur on discordant gene trees (Mendes et al., 2016).  
700 Accordingly, to identify loci that might be responsible for any particular trait transitions,  
701 different approaches will be appropriate depending upon the confidence with which  
702 hemiplasy can be excluded or not. For traits evolving on branches where discordance is  
703 low, confidence is high, and hemiplasy is unlikely, it is reasonable to expect that lineage-  
704 specific *de novo* substitutions are a substantial contributor to relevant trait evolution.  
705 Given a high risk of hemiplasy, genetic variation underpinning trait evolution could  
706 potentially come from additional sources, including recruitment of ancestral  
707 polymorphisms and/or introgression. These differences are exemplified in our study by  
708 the alternative histories, and different genetic hypotheses, generated for fruit color versus  
709 floral shape traits.

710

711 **Floral shape evolution** – Based on the inferred species tree (Figure 2A), the 14  
712 investigated *Jaltomata* species are not related according to their floral shape traits (i.e.  
713 floral shape is distributed paraphyletically). Moreover, the branch lengths leading to  
714 lineages with derived character states are uniformly short with high levels of gene tree



715 discordance (Figure 2A), so that the probability of hemiplasy is expected (Hahn &  
716 Nakhleh, 2016) to be very high. Indeed, when we reconstruct the evolution of corolla  
717 shape (Figure 4B), the three alternative corolla morphs were inferred to be almost equally  
718 likely at the common ancestor of non-purple-fruited lineages. It is possible that this lack  
719 of resolution is due to introgression. For example, the ancestral floral character states (i.e.  
720 rotate corolla shapes and clear nectar) found in *J. yungayensis* and *J. sinuosa* within the  
721 orange-fruited clade could be due to alleles introgressed from purple-fruited species, as  
722 we identified putative introgression events between those lineages (Figure 3B). However,  
723 the lack of a reference genome for *Jaltomata* precluded us from more directly  
724 investigating evidence (for example, locus-specific patterns of introgression) that  
725 introgression might contribute to the distribution of ancestral floral traits within this sub-  
726 clade. Instead, because of the high risk of hemiplasy and low resolution of ancestral states,  
727 we used several approaches to identify the genetic variants associated with the two other  
728 potential sources of trait variation.

729         First, if the paraphyletic distribution of derived traits is due to hemiplasy among  
730 species, the relevant nucleotide differences should be at the same sites in all lineages that  
731 share derived traits (Hahn & Nakhleh, 2016). Using this rationale, Pease et al. (2016)  
732 identified tens to hundreds of genetic variants among wild tomato lineages that were  
733 exclusively associated with each of three ecological factors, variants that are candidate  
734 targets of parallel ecological selection on standing ancestral variation in that group. Here,  
735 we used an analogous approach to look for variants associated with phenotypic (floral)  
736 trait variation in *Jaltomata*, and identified 31 candidate genes with nonsynonymous  
737 variants that are completely correlated with the distribution of floral trait variation

738 (derived vs. ancestral; Figure S2). Among them, the gene *AGO1* (ortholog to  
739 *Solyc02g069260*) is known to be necessary in *Arabidopsis* floral stem cell termination  
740 and might act through *CUC1* and *CUC2* (*a priori* candidate genes), which redundantly  
741 specify boundaries of floral meristem (Ji et al., 2011; Kidner & Martienssen, 2005).  
742 Another gene *DcEXPA2* (ortholog to *Solyc02g091920*) is known to be markedly up-  
743 regulated in the petals of carnation (*Diathathus caryophyllus*), and is potentially  
744 associated with the petal growth and development (Harada et al., 2010). We also note that,  
745 although these shared hemiplasious variants could be due to post-speciation introgression  
746 rather than sorting from ancestral variation, given the often allopatric geographical  
747 distribution of our lineages (Figure 1) and evidence of substantial allelic sharing among  
748 contemporary subclades (Figure 3A), we infer that these variants were more likely sorted  
749 from ancestral variation.

750         Second, because our reconstruction of floral trait evolution could not exclude the  
751 role of lineage-specific *de novo* mutation, we also examined our transcriptomes for genes  
752 showing lineage-specific evolution associated with the derived floral traits. However, we  
753 found that only a small number of genes were testable due to the extensive gene tree  
754 discordance specifically at the branches leading to subclades with the derived floral  
755 characters. Moreover, none of our *a priori* candidate genes involved in floral  
756 development showed suggestive patterns of molecular evolution on internal branches of  
757 *Jaltomata* (Table S7), nor did we find any other functionally suggestive (floral  
758 development-related) genes adaptively evolving on branches leading to specific  
759 subclades within *Jaltomata*, with the exception of *APETALA3* (*AP3*)—a gene associated  
760 with the formation of petals and stamens in flowering plants, including

761 *Arabidopsis* (Wuest et al., 2012; Specht & Howarth, 2015)—although this was detected  
762 on the branch leading to the purple-fruited clade, within which all species retain the  
763 ancestral rotate corolla form.

764

765 **Fruit color evolution** – In contrast to floral traits, ancestral state reconstruction in the 14  
766 investigated *Jaltomata* species suggested that fruit color transitions follow phylogenetic  
767 relationships. The ancestral states of fruit colors at most relevant internodes can be  
768 inferred with high confidence (Figure 4A), and the internal branches leading to fruit trait  
769 transitions are well-supported, indicating a low probability of hemiplasy (Figure 2A).

770 Accordingly, we identified a set of loci showing adaptive evolution specifically on these  
771 branches, provided that each tested gene tree 1) supported the internal branch being  
772 tested, and 2) showed at least one clade-specific nonsynonymous substitution on that  
773 branch (Mendes et al., 2016; Pease et al., 2016), to avoid potential inference errors

774 associated with examining genes that have topologies discordant with the species tree  
775 (Mendes et al., 2016). Our analyses revealed multiple adaptively evolving candidate loci  
776 with clear functional relevance to these trait transitions, including several *a priori*

777 candidate genes involved in the carotenoid pathway (Yuan et al., 2015) (Figure 7). First,  
778 *Z-ISO* (ortholog to *Solyc12g098710*), a key enzyme in the production of red-colored  
779 lycopene in the carotenoid biosynthetic pathway (Chen et al., 2010), was positively  
780 selected on the branch leading to our one species with bright red fruit, *J. auriculata*.

781 Interestingly, this gene was also previously found to show adaptive evolution specifically  
782 on the branch leading to the red-fruited (Esculentum) group in wild tomatoes (Pease et  
783 al., 2016). Second, on the branch leading to our two green-fruited species, we found

784 significantly elevated  $d_N/d_S$  ratios for both *CCDIA* (ortholog to *Solyc01g087250*), a gene  
785 whose product participates in the conversion of carotenoid pigments to isoprenoid  
786 volatiles (Ilg et al., 2014), and for *ZEP* (ortholog to *Solyc02g090890*), which converts  
787 zeaxanthin to violaxanthin (Marin et al., 1996). *CCDI* has previously been identified in  
788 tomato fruits as responsible for generating flavor volatiles (Auldridge et al., 2006; Simkin  
789 et al., 2004). This functional observation from a closely related group is intriguing  
790 because fruits of our two green-fruited species (*J. quipuscoae* and *J. calliantha*) appear to  
791 produce the strongest scent within the 14 *Jaltomata* species analyzed here (J. Kostyun,  
792 unpubl. data). This apparent increase in fragrance—presumably due to changed volatile  
793 organic compounds—might play a role in attracting vertebrate frugivores for seed  
794 dispersal.

795         In addition to carotenoids, among *a priori* candidate genes involved in the  
796 biosynthesis pathway of water-soluble vacuolar anthocyanin pigments, we detected  
797 *BANYULS* (ortholog to *Solyc03g031470*) selected on the red-fruited branch. (Note that  
798 PAML also indicates adaptive molecular evolution of this locus on the purple-fruited  
799 branch, but this appears to be due to the presence of a MNM; see results). In addition to *a*  
800 *priori* candidates, genome-wide unbiased analyses also identified that multiple genes  
801 belonging to *R2R3MYB*, *BHLH* and *WD40*-repeats classes of loci were under positive  
802 selection in purple-fruited lineages and the red-fruited lineage. The *MYB-BHLH-WD40*  
803 TF complexes are known to regulate cellular differentiation pathways, including of the  
804 epidermis, as well as transcription of anthocyanin structural genes (Gonzalez et al., 2008;  
805 Jaakola, 2013; Ramsay & Glover, 2005).

806

807 *Implications for the inference of phenotypic trait evolution and causal genetic variation*  
808 *in rapid radiating lineages*

809 As highlighted here and in numerous recent phylogenomic studies (Eaton & Ree,  
810 2013; Novikova et al., 2016; Owens et al., 2016; Pease et al., 2016), both ILS and  
811 introgression contribute to the history of diversification within radiating clades, so that  
812 evolution in these groups is more complex than can be represented by a simple  
813 bifurcating species tree. This complexity has important implications for empirical  
814 inferences about historical relationships and trait evolution, because assuming resolved  
815 relationships without taking into account incongruence can fundamentally mislead  
816 inferences in both these cases (Hahn & Nakhleh, 2016). It also must be accounted for  
817 when considering the genetic changes that might have fueled diversification; when a trait  
818 has several possible alternative evolutionary histories, it is necessary to investigate the  
819 range of alternative sources of genetic variation—including *de novo* lineage-specific  
820 evolution and selection from ancestral variation—that could fuel this trait evolution.  
821 Here, we provided a genome-wide analysis of the recently diversified plant genus  
822 *Jaltomata* in which we consider the relative risk of hemiplasy while identifying  
823 candidates for the specific loci underlying trait evolution. Our analysis highlights a  
824 growing appreciation that rapid radiations can and likely do draw on multiple sources of  
825 genetic variation (Hedrick, 2013; Pease et al., 2016; Richards & Martin, 2017). Indeed,  
826 while independently originating variants could explain the recurrent evolution of  
827 phenotypic similarity—a frequent observation in adaptive radiations—it is clear that  
828 shared ancestral genetic variation, or alleles introgressed from other lineages, have also  
829 made substantial contributions (Elmer & Meyer, 2011; Stern, 2013). Going forward, it

830 will be necessary to distinguish between these alternative scenarios to understand how  
831 different evolutionary paths contribute to phenotypic convergence and differentiation  
832 (Martin & Orgogozo, 2013; Stern, 2013) and to identify the specific variants responsible.

833

#### 834 **ACKNOWLEDGEMENTS**

835 The authors thank James Pease, Rafael Guerrero and Fabio Mendes for advice on  
836 performing comparative phylogenomic and molecular evolution analyses. This research  
837 was funded by National Science Foundation grant DEB-1135707, to LCM and MWH.

838

#### 839 **AUTHOR CONTRIBUTIONS**

840 L.C.M, M.W., M.W.H., and J.L.K. designed the experiments; J.L.K generated the  
841 experimental materials; M.W. conducted the bioinformatics analyses; and M.W. and  
842 L.C.M. wrote the paper with contributions from M.W.H. and J.L.K.

843

#### 844 **DATA AVAILABILITY**

845 Raw reads (FASTQ files) for generating the 14 species transcriptomes are  
846 deposited in the NCBI SRA (BioProject: PRJNA380644). Multiple sequence alignments  
847 used for phylogenetic tree reconstruction and molecular evolution analyses are available  
848 at Dryad (doi: XXX). All commands and scripts used for analyses in this study can be  
849 found in our project directory on GitHub (<https://github.com/wum5/JaltPhylo>).

850

## 851 LITERATURE CITED

- 852 Auldridge, M. E., McCarty, D. R., & Klee, H. J. (2006). Plant carotenoid cleavage oxygenases and their  
853 apocarotenoid products. *Current Opinion in Plant Biology*, *9*, 315-321.
- 854 Avise, J. C., & Robinson, T. J. (2008). Hemiplasy: a new term in the lexicon of phylogenetics. *Systematic*  
855 *Biology*, *57*, 503-507.
- 856 Bauer, S., Grossmann, S., Vingron, M., & Robinson, P. N. (2008). Ontologizer 2.0—a multifunctional tool  
857 for GO term enrichment analysis and data exploration. *Bioinformatics*, *24*, 1650-1651.
- 858 Benjamini, Y., & Hochberg, Y. (1995). Controlling the false discovery rate: a practical and powerful  
859 approach to multiple testing. *Journal of the Royal Statistical Society. Series B (Methodological)*,  
860 289-300.
- 861 Bouckaert, R. R. (2010). DensiTree: making sense of sets of phylogenetic trees. *Bioinformatics*, *26*, 1372-  
862 1373.
- 863 Brawand, D., Wagner, C. E., Li, Y. I., Malinsky, M., Keller, I., Fan, S., . . . Bezault, E. (2014). The genomic  
864 substrate for adaptive radiation in African cichlid fish. *Nature*, *513*, 375-381.
- 865 Chen, Y., Li, F., & Wurtzel, E. T. (2010). Isolation and characterization of the Z-ISO gene encoding a  
866 missing component of carotenoid biosynthesis in plants. *Plant Physiology*, *153*, 66-79.
- 867 Cui, R., Schumer, M., Kruesi, K., Walter, R., Andolfatto, P., & Rosenthal, G. G. (2013). Phylogenomics  
868 reveals extensive reticulate evolution in Xiphophorus fishes. *Evolution*, *67*, 2166-2179.
- 869 Degnan, J. H., & Rosenberg, N. A. (2009). Gene tree discordance, phylogenetic inference and the  
870 multispecies coalescent. *Trends in Ecology & Evolution*, *24*, 332-340.
- 871 Dobin, A., Davis, C. A., Schlesinger, F., Drenkow, J., Zaleski, C., Jha, S., . . . Gingeras, T. R. (2013). STAR:  
872 ultrafast universal RNA-seq aligner. *Bioinformatics*, *29*, 15-21.
- 873 Durand, E. Y., Patterson, N., Reich, D., & Slatkin, M. (2011). Testing for ancient admixture between  
874 closely related populations. *Molecular Biology and Evolution*, *28*, 2239-2252.
- 875 Eaton, D. A., & Ree, R. H. (2013). Inferring phylogeny and introgression using RADseq data: an example  
876 from flowering plants (Pedicularis: Orobanchaceae). *Systematic Biology*, *62*, 689-706.
- 877 Elmer, K. R., & Meyer, A. (2011). Adaptation in the age of ecological genomics: insights from parallelism  
878 and convergence. *Trends in Ecology & Evolution*, *26*, 298-306.
- 879 Felsenstein, J. (1985). Phylogenies and the comparative method. *The American Naturalist*, *125*, 1-15.
- 880 Fontaine, M. C., Pease, J. B., Steele, A., Waterhouse, R. M., Neafsey, D. E., Sharakhov, I. V., . . . Kakani, E.  
881 (2015). Extensive introgression in a malaria vector species complex revealed by phylogenomics.  
882 *Science*, *347*, 1258524.
- 883 Fu, L., Niu, B., Zhu, Z., Wu, S., & Li, W. (2012). CD-HIT: accelerated for clustering the next-generation  
884 sequencing data. *Bioinformatics*, *28*, 3150-3152.
- 885 Garrigan, D., Kingan, S. B., Geneva, A. J., Andolfatto, P., Clark, A. G., Thornton, K. R., & Presgraves, D.  
886 C. (2012). Genome sequencing reveals complex speciation in the *Drosophila simulans* clade.  
887 *Genome Research*, *22*, 1499-1511.
- 888 Gonzalez, A., Zhao, M., Leavitt, J. M., & Lloyd, A. M. (2008). Regulation of the anthocyanin biosynthetic  
889 pathway by the TTG1/bHLH/Myb transcriptional complex in Arabidopsis seedlings. *The Plant*  
890 *Journal*, *53*, 814-827.
- 891 Grabherr, M. G., Haas, B. J., Yassour, M., Levin, J. Z., Thompson, D. A., Amit, I., . . . Zeng, Q. (2011).  
892 Trinity: reconstructing a full-length transcriptome without a genome from RNA-Seq data. *Nature*  
893 *Biotechnology*, *29*, 644.
- 894 Green, R. E., Krause, J., Briggs, A. W., Maricic, T., Stenzel, U., Kircher, M., . . . Fritz, M. H.-Y. (2010). A  
895 draft sequence of the Neandertal genome. *Science*, *328*, 710-722.
- 896 Haas, B. J., Papanicolaou, A., Yassour, M., Grabherr, M., Blood, P. D., Bowden, J., . . . Lieber, M. (2013).  
897 De novo transcript sequence reconstruction from RNA-seq using the Trinity platform for reference  
898 generation and analysis. *Nature Protocols*, *8*, 1494-1512.
- 899 Hahn, M. W., & Nakhleh, L. (2016). Irrational exuberance for resolved species trees. *Evolution*, *70*, 7-17.
- 900 Harada, T., Torii, Y., Morita, S., Onodera, R., Hara, Y., Yokoyama, R., . . . Satoh, S. (2010). Cloning,  
901 characterization, and expression of xyloglucan endotransglucosylase/hydrolase and expansin  
902 genes associated with petal growth and development during carnation flower opening. *Journal of*  
903 *Experimental Botany*, erq319.
- 904 Harrison, P. W., Jordan, G. E., & Montgomery, S. H. (2014). SWAMP: sliding window alignment masker  
905 for PAML. *Evolutionary Bioinformatics*, *10*, 197.

- 906 Heath, T. A., Hedtke, S. M., & Hillis, D. M. (2008). Taxon sampling and the accuracy of phylogenetic  
907 analyses. *Journal of Systematics and Evolution*, *46*, 239-257.
- 908 Hedrick, P. W. (2013). Adaptive introgression in animals: examples and comparison to new mutation and  
909 standing variation as sources of adaptive variation. *Molecular Ecology*, *22*, 4606-4618.
- 910 Hudson, R. R. (2002). Generating samples under a Wright–Fisher neutral model of genetic variation.  
911 *Bioinformatics*, *18*, 337-338.
- 912 Huelsenbeck, J. P., & Ronquist, F. (2001). MRBAYES: Bayesian inference of phylogenetic trees.  
913 *Bioinformatics*, *17*, 754-755.
- 914 Ilg, A., Bruno, M., Beyer, P., & Al-Babili, S. (2014). Tomato carotenoid cleavage dioxygenases 1A and 1B:  
915 Relaxed double bond specificity leads to a plenitude of dialdehydes, mono - apocarotenoids and  
916 isoprenoid volatiles. *FEBS Open Bio*, *4*, 584-593.
- 917 Jaakola, L. (2013). New insights into the regulation of anthocyanin biosynthesis in fruits. *Trends in Plant  
918 Science*, *18*, 477-483.
- 919 Ji, L., Liu, X., Yan, J., Wang, W., Yumul, R. E., Kim, Y. J., . . . Zheng, B. (2011). ARGONAUTE10 and  
920 ARGONAUTE1 regulate the termination of floral stem cells through two microRNAs in  
921 Arabidopsis. *PLoS Genetics*, *7*, e1001358.
- 922 Kidner, C. A., & Martienssen, R. A. (2005). The role of ARGONAUTE1 (AGO1) in meristem formation  
923 and identity. *Developmental Biology*, *280*, 504-517.
- 924 Knapp S. (2010). On 'various contrivances': pollination, phylogeny and flower form in the Solanaceae.  
925 *Philosophical Transactions of the Royal Society B*, *365*, 449-460.
- 926 Kostyun, J. L., & Moyle, L. C. (2017). Multiple strong postmating and intrinsic postzygotic reproductive  
927 barriers isolate florally diverse species of *Jaltomata* (Solanaceae). *Evolution*.
- 928 Krizek, B. A., & Anderson, J. T. (2013). Control of flower size. *Journal of Experimental Botany*, *64*, 1427-  
929 1437.
- 930 Kubatko, L. S., & Degnan, J. H. (2007). Inconsistency of phylogenetic estimates from concatenated data  
931 under coalescence. *Systematic Biology*, *56*, 17-24.
- 932 Lamichhaney, S., Berglund, J., Almén, M. S., Maqbool, K., Grabherr, M., Martinez-Barrio, A., . . . Zamani,  
933 N. (2015). Evolution of Darwin's finches and their beaks revealed by genome sequencing. *Nature*,  
934 *518*, 371-375.
- 935 Larget, B. R., Kotha, S. K., Dewey, C. N., & Ané, C. (2010). BUCKy: gene tree/species tree reconciliation  
936 with Bayesian concordance analysis. *Bioinformatics*, *26*, 2910-2911.
- 937 Li, H., Handsaker, B., Wysoker, A., Fennell, T., Ruan, J., Homer, N., . . . Durbin, R. (2009). The sequence  
938 alignment/map format and SAMtools. *Bioinformatics*, *25*, 2078-2079.
- 939 Li, Y. F., Costello, J. C., Holloway, A. K., & Hahn, M. W. (2008). “Reverse ecology” and the power of  
940 population genomics. *Evolution*, *62*, 2984-2994.
- 941 Löytynoja, A., & Goldman, N. (2005). An algorithm for progressive multiple alignment of sequences with  
942 insertions. *Proceedings of the National Academy of Sciences of the United States of America*, *102*,  
943 10557-10562.
- 944 Maddison, W. P. (1997). Gene trees in species trees. *Systematic Biology*, *46*, 523-536.
- 945 Marin, E., Nussaume, L., Quesada, A., Gonneau, M., Sotta, B., Hugueney, P., . . . Marion-Poll, A. (1996).  
946 Molecular identification of zeaxanthin epoxidase of *Nicotiana plumbaginifolia*, a gene involved in  
947 abscisic acid biosynthesis and corresponding to the ABA locus of *Arabidopsis thaliana*. *The  
948 EMBO Journal*, *15*, 2331.
- 949 Martin, A., & Orgogozo, V. (2013). The loci of repeated evolution: a catalog of genetic hotspots of  
950 phenotypic variation. *Evolution*, *67*, 1235-1250.
- 951 Martin, S. H., Dasmahapatra, K. K., Nadeau, N. J., Salazar, C., Walters, J. R., Simpson, F., . . . Jiggins, C. D.  
952 (2013). Genome-wide evidence for speciation with gene flow in *Heliconius* butterflies. *Genome  
953 Research*, *23*, 1817-1828.
- 954 Mendes, F. K., Hahn, Y., & Hahn, M. W. (2016). Gene tree discordance can generate patterns of  
955 diminishing convergence over time. *Molecular Biology and Evolution*, *33*, 3299-3307.
- 956 Miller, R. J., Mione, T., Phan, H.-L., & Olmstead, R. G. (2011). Color by numbers: Nuclear gene  
957 phylogeny of *Jaltomata* (Solanaceae), sister genus to *Solanum*, supports three clades differing in  
958 fruit color. *Systematic Botany*, *36*, 153-162.
- 959 Mirarab, S., & Warnow, T. (2015). ASTRAL-II: coalescent-based species tree estimation with many  
960 hundreds of taxa and thousands of genes. *Bioinformatics*, *31*, i44-i52.
- 961 Moine, T. (1992). *Systematics and evolution of Jaltomata (Solanaceae)*. Ph. D. Dissertation. Storrs,



- 962 Connecticut: University of Connecticut.
- 963 Mione T., S. Leiva González & L. Yacher. (2015). Two new Peruvian species of *Jaltomata* (Solanaceae,  
964 Solanaceae) with red floral nectar. *Brittonia*, 67, 105-112.
- 965 Novikova, P. Y., Hohmann, N., Nizhynska, V., Tsuchimatsu, T., Ali, J., Muir, G., . . . Fedorenko, O. M.  
966 (2016). Sequencing of the genus *Arabidopsis* identifies a complex history of nonbifurcating  
967 speciation and abundant trans-specific polymorphism. *Nature Genetics*, 48, 1077–1082.
- 968 Olmstead, R. G., Bohs, L., Migid, H. A., Santiago-Valentin, E., Garcia, V. F., & Collier, S. M. (2008). A  
969 molecular phylogeny of the Solanaceae. *Taxon*, 57, 1159-1181.
- 970 Owens, G. L., Baute, G. J., & Rieseberg, L. H. (2016). Revisiting a classic case of introgression:  
971 Hybridization and gene flow in Californian sunflowers. *Molecular Ecology*, 25, 2630–2643.
- 972 Pamilo, P., & Nei, M. (1988). Relationships between gene trees and species trees. *Molecular Biology and*  
973 *Evolution*, 5, 568-583.
- 974 Paradis, E., Claude, J., & Strimmer, K. (2004). APE: analyses of phylogenetics and evolution in R language.  
975 *Bioinformatics*, 20, 289-290.
- 976 Pease, J., & Rosenzweig, B. (2015). Encoding data using biological principles: the Multisample Variant  
977 Format for phylogenomics and population genomics. *IEEE/ACM Transactions on Computational*  
978 *Biology and Bioinformatics*, doi:10.1109/tcbb.2015.2509997.
- 979 Pease, J. B., Haak, D. C., Hahn, M. W., & Moyle, L. C. (2016). Phylogenomics reveals three sources of  
980 adaptive variation during a rapid radiation. *PLoS Biology*, 14, e1002379.
- 981 Pease, J. B., & Hahn, M. W. (2015). Detection and polarization of introgression in a five-taxon phylogeny.  
982 *Systematic Biology*, 64, 651-662.
- 983 Ramsay, N. A., & Glover, B. J. (2005). MYB–bHLH–WD40 protein complex and the evolution of cellular  
984 diversity. *Trends in Plant Science*, 10, 63-70.
- 985 Rauscher, M. D. (2008). Evolutionary transitions in floral color. *International Journal of Plant Sciences*, 169,  
986 7-21.
- 987 Revell, L. J. (2012). phytools: an R package for phylogenetic comparative biology (and other things).  
988 *Methods in Ecology and Evolution*, 3, 217-223.
- 989 Richards, E. J., & Martin, C. H. (2017). Adaptive introgression from distant Caribbean islands contributed  
990 to the diversification of a microendemic adaptive radiation of trophic specialist pupfishes. *PLoS*  
991 *Genetics*, 13, e1006919.
- 992 Salichos, L., & Rokas, A. (2013). Inferring ancient divergences requires genes with strong phylogenetic  
993 signals. *Nature*, 497, 327-331.
- 994 Särkinen, T., Bohs, L., Olmstead, R. G., & Knapp, S. (2013). A phylogenetic framework for evolutionary  
995 study of the nightshades (Solanaceae): a dated 1000-tip tree. *BMC Evolutionary Biology*, 13, 214.
- 996 Sela, I., Ashkenazy, H., Katoh, K., & Pupko, T. (2015). GUIDANCE2: accurate detection of unreliable  
997 alignment regions accounting for the uncertainty of multiple parameters. *Nucleic Acids Research*,  
998 43, W7-W14.
- 999 Simkin, A. J., Schwartz, S. H., Auldridge, M., Taylor, M. G., & Klee, H. J. (2004). The tomato carotenoid  
1000 cleavage dioxygenase 1 genes contribute to the formation of the flavor volatiles  $\beta$  - ionone,  
1001 pseudoionone, and geranylacetone. *The Plant Journal*, 40, 882-892.
- 1002 Specht, C. D., & Howarth, D. G. (2015). Adaptation in flower form: a comparative evodevo approach. *New*  
1003 *Phytologist*, 206, 74-90.
- 1004 Stamatakis, A. (2006). RAxML-VI-HPC: maximum likelihood-based phylogenetic analyses with thousands  
1005 of taxa and mixed models. *Bioinformatics*, 22, 2688-2690.
- 1006 Stern, D. L. (2013). The genetic causes of convergent evolution. *Nature Reviews Genetics*, 14, 751-764.
- 1007 Storz, J. F. (2016). Causes of molecular convergence and parallelism in protein evolution. *Nature Reviews*  
1008 *Genetics*, 17, 239-250.
- 1009 The Tomato Genome Consortium. (2012). The tomato genome sequence provides insights into fleshy fruit  
1010 evolution. *Nature*, 485, 635-641.
- 1011 Venkat, A., Hahn, M. W., & Thornton, J. W. (2017). Multinucleotide mutations cause false inferences of  
1012 positive selection. *bioRxiv*. doi:10.1101/165969
- 1013 Wake, D. B., Wake, M. H., & Specht, C. D. (2011). Homoplasy: from detecting pattern to determining  
1014 process and mechanism of evolution. *Science*, 331, 1032-1035.
- 1015 Wickett, N. J., Mirarab, S., Nguyen, N., Warnow, T., Carpenter, E., Matasci, N., . . . Gitzendanner, M. A.  
1016 (2014). Phylotranscriptomic analysis of the origin and early diversification of land plants.  
1017 *Proceedings of the National Academy of Sciences of the United States of America*, 111, E4859-

- 1018 E4868.  
1019 Wuest, S. E., O'Maoileidigh, D. S., Rae, L., Kwasniewska, K., Raganelli, A., Hanczaryk, K., . . . Wellmer,  
1020 F. (2012). Molecular basis for the specification of floral organs by APETALA3 and PISTILLATA.  
1021 *Proceedings of the National Academy of Sciences*, *109*, 13452-13457.  
1022 Yang, Y., Moore, M. J., Brockington, S. F., Soltis, D. E., Wong, G. K.-S., Carpenter, E. J., . . . Xie, Y.  
1023 (2015). Dissecting molecular evolution in the highly diverse plant clade Caryophyllales using  
1024 transcriptome sequencing. *Molecular Biology and Evolution*, *32*, 2001-2014.  
1025 Yang, Y., & Smith, S. A. (2014). Orthology inference in nonmodel organisms using transcriptomes and  
1026 low-coverage genomes: improving accuracy and matrix occupancy for phylogenomics. *Molecular*  
1027 *Biology and Evolution*, *31*, 3081-3092.  
1028 Yang, Z. (2007). PAML 4: phylogenetic analysis by maximum likelihood. *Molecular Biology and Evolution*,  
1029 *24*, 1586-1591.  
1030 Yuan, H., Zhang, J., Nageswaran, D., & Li, L. (2015). Carotenoid metabolism and regulation in  
1031 horticultural crops. *Horticulture Research*, *2*, 15036.  
1032  
1033

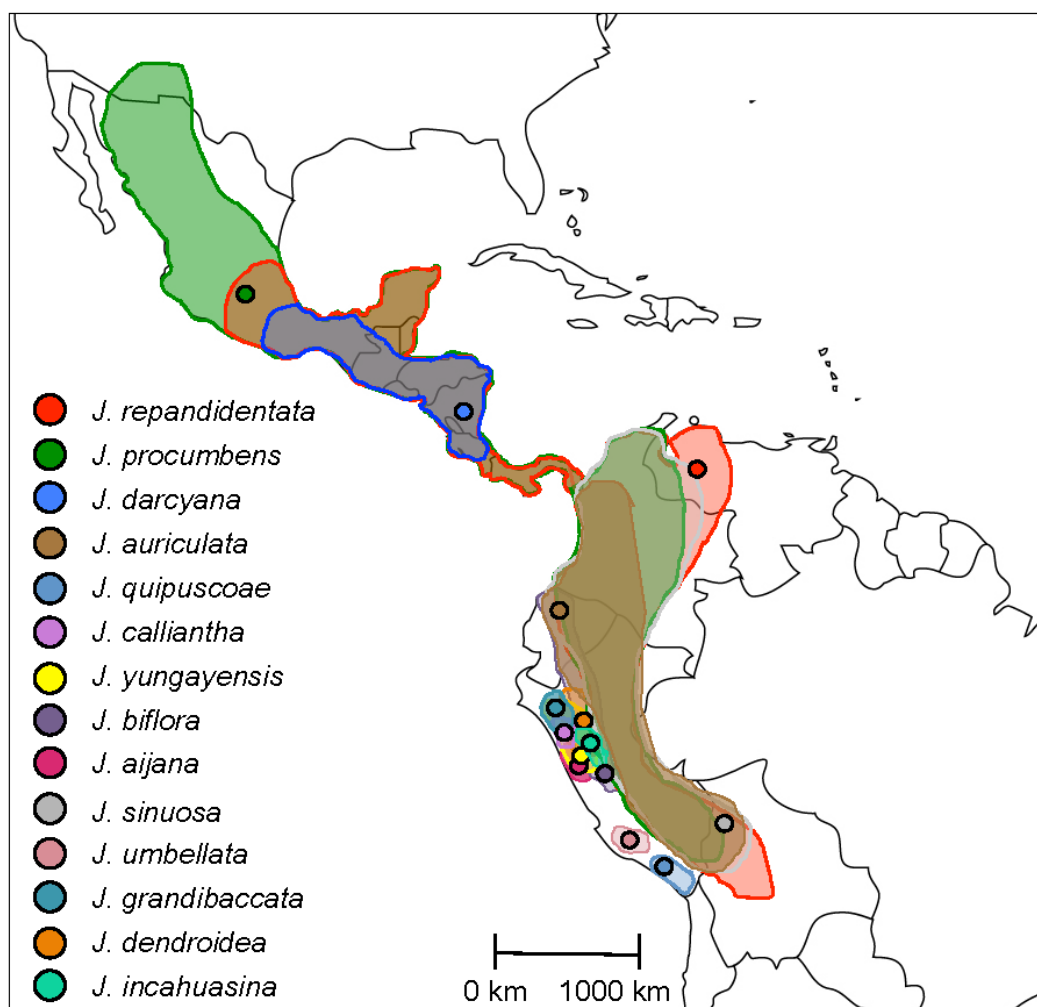

**Fig 1.** Geographic distribution of investigated *Jaltomata* species. For each species, the sample location is labeled. Ranges estimated from herbarium specimens (T. Mione and S. Leiva G., pers. comm.; J. L. Kostyun, unpub.).

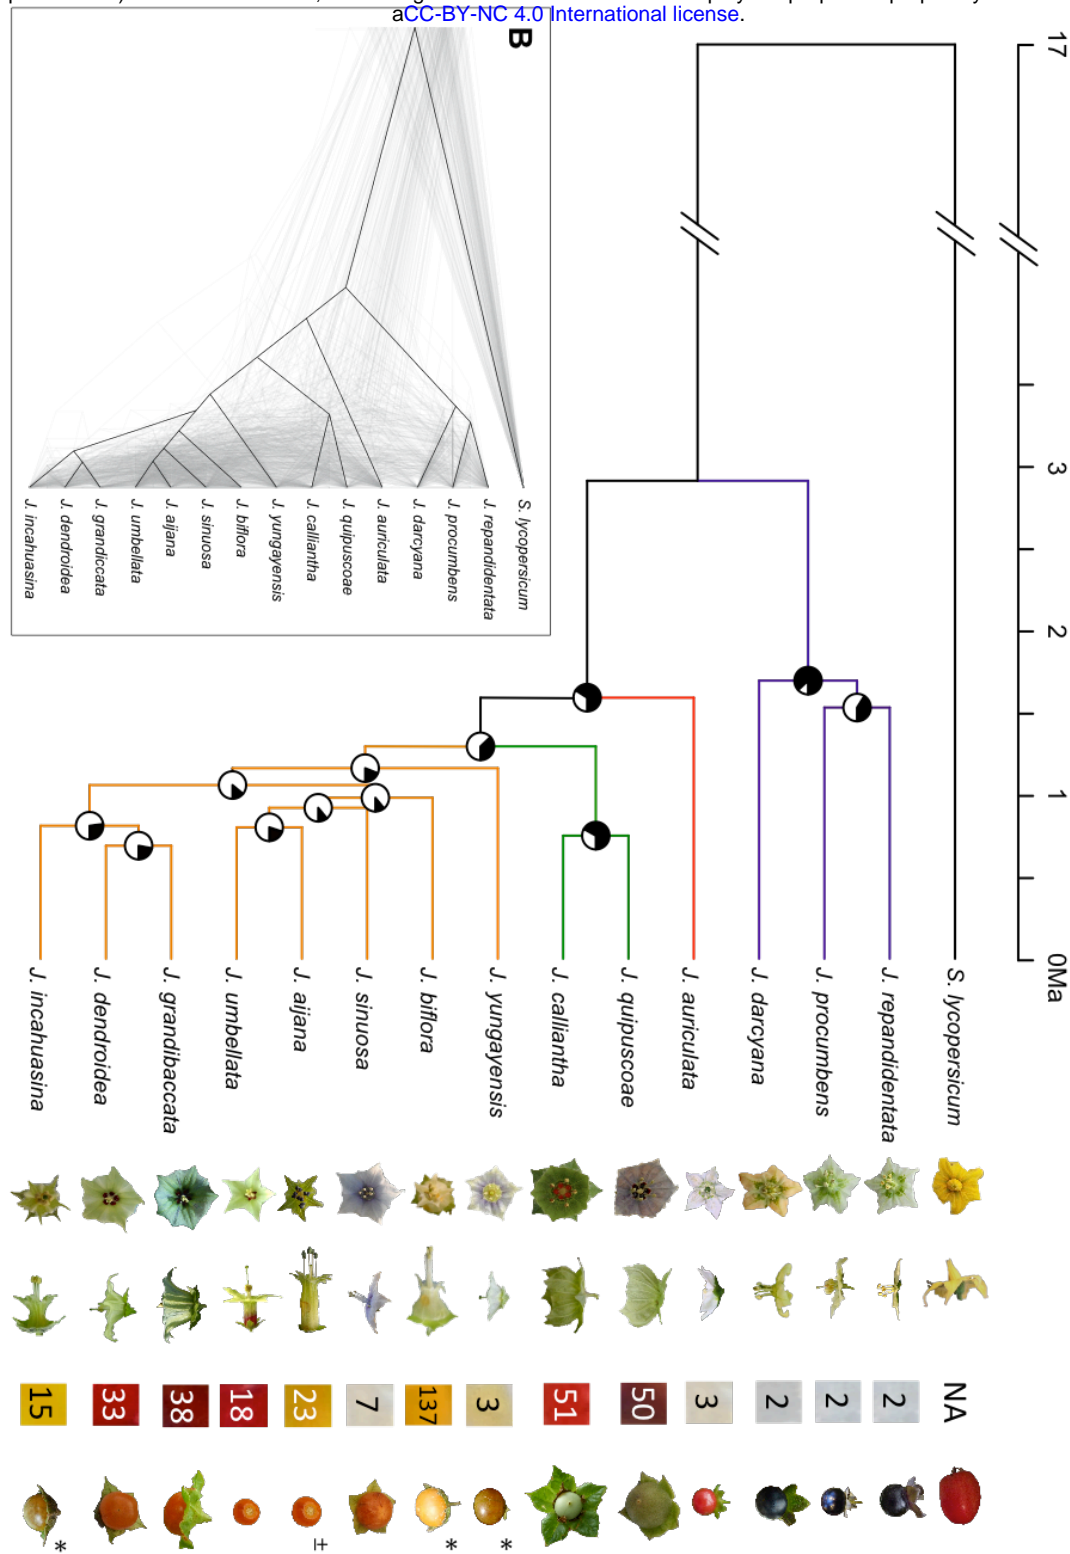

**Fig 2.** The phylogeny of investigated *Jaltomata* species. **(A)** A whole-transcriptome concatenated phylogeny of *Jaltomata* species with *Solanum lycopersicum* as outgroup. The Pie chart on each internode shows the concordance factor estimated from BUCKy, with the amount of black representing the degree of concordance. Divergence times estimated in *ape* with 17MYA *Jaltomata-Solanum* calibration from (Särkinen et al., 2013). Representative flower and fruit images to the right of species names: front view of flower, lateral view of flower, nectar color and volume (uL) per flower, and ripe fruit. Image with ± indicates that fruit from a similar species is shown, and \* indicates contributed by Dr. Thomas Mione at Central Connecticut State University.

**(B)** A ‘cloudogram’ of 183 gene trees whose average bootstrap values are larger than 70 across the nodes. For contrast, the concatenated tree (Fig 2A) is shown in black.

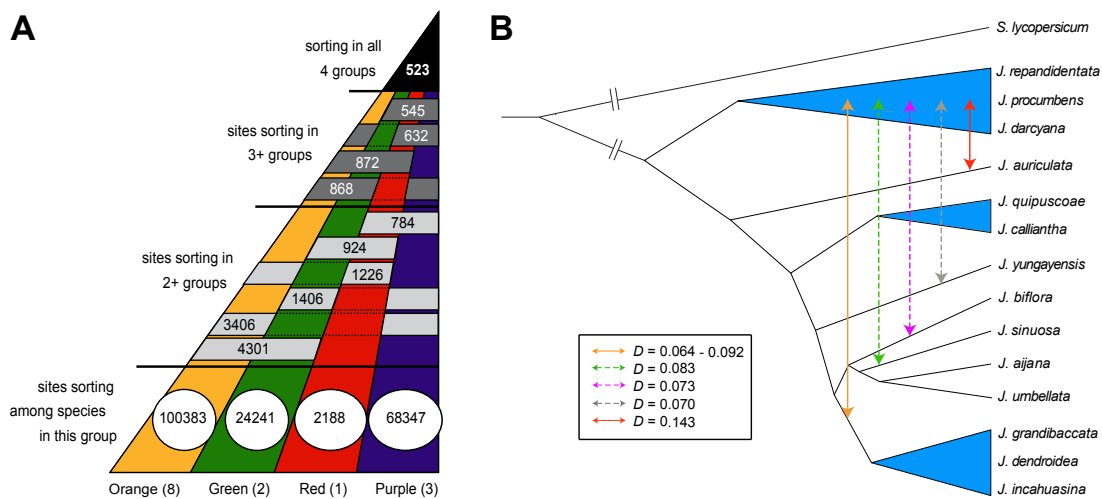

**Fig 3.** (A) Allele sorting, with the number of genetic variants within or shared between each *Jaltomata* subclade. (B) The introgression pattern among *Jaltomata* lineages. The solid lines indicate strong evidence of introgression between two lineages or sub-clades, while the dashed lines indicate putative introgression. The corresponding Patterson's *D* statistic value is labeled for each putative introgression event.

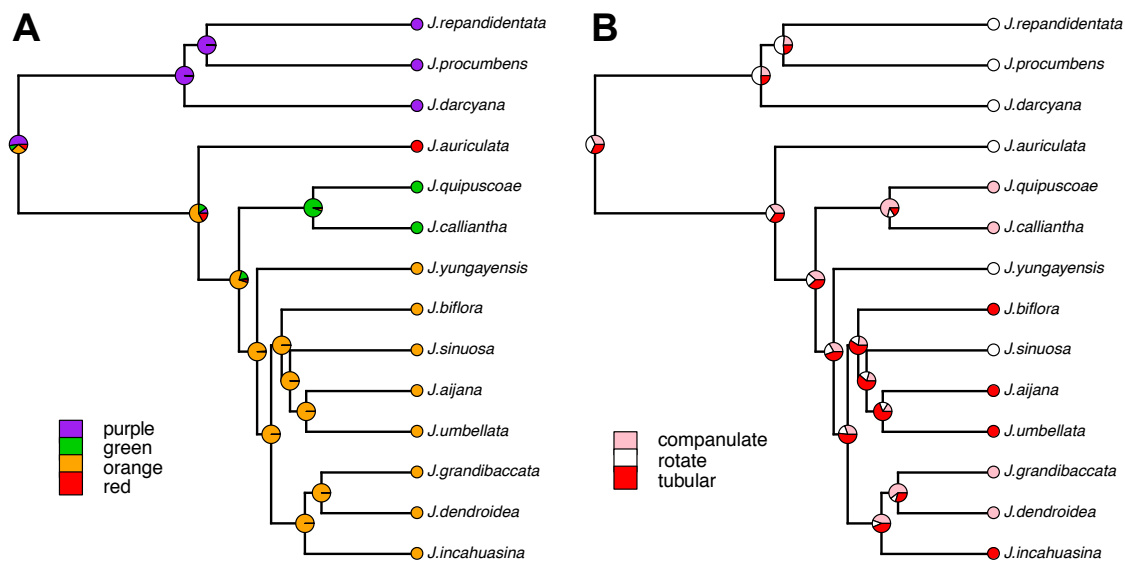

**Fig 4.** Ancestral character-state reconstruction of (A) fruit color, (B) corolla shape in investigated *Jaltomata* using maximum likelihood.

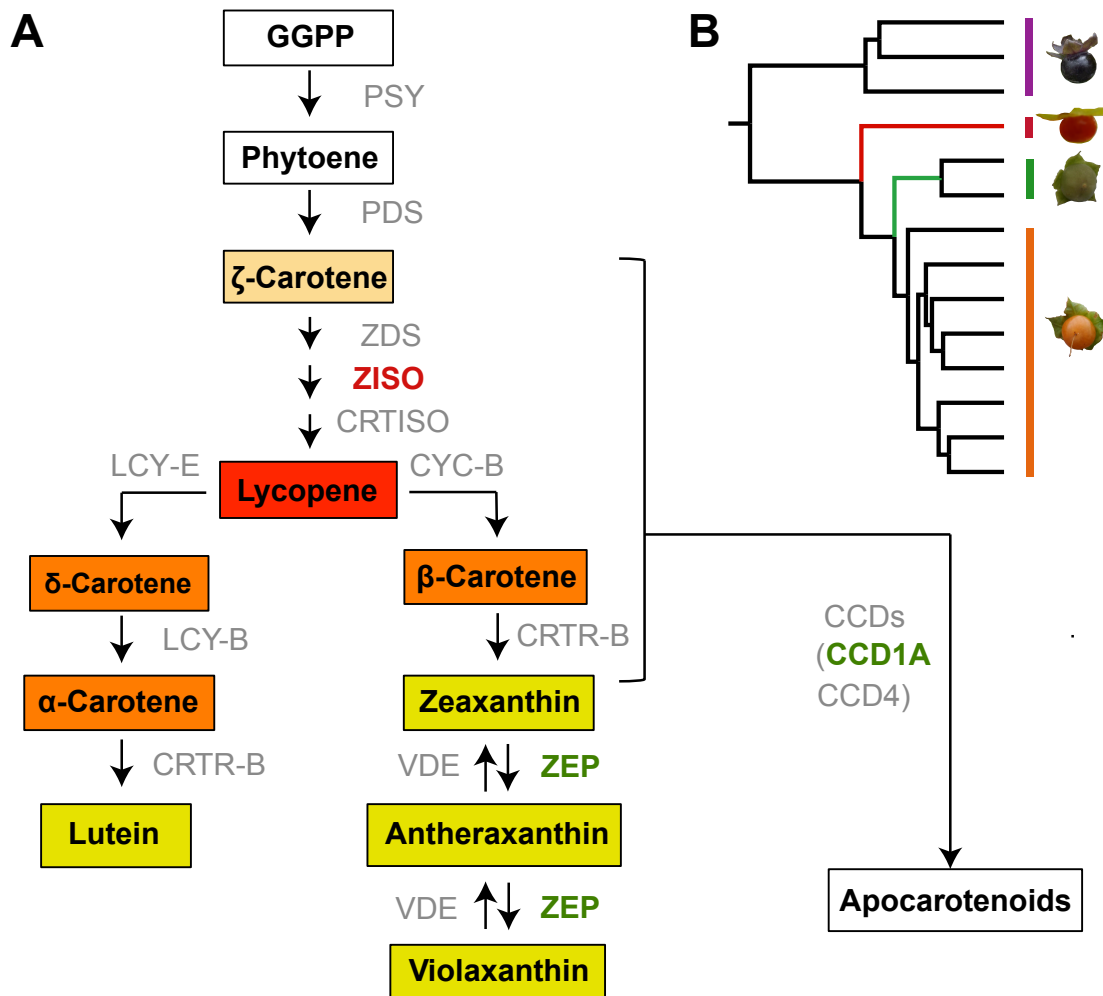

**Fig 5.** Genes under adaptive evolution in the carotenoid biosynthesis pathway. **(A)** Simplified carotenoid biosynthesis pathway modified from (Yuan et al. 2015). Genes under adaptive evolution are indicated by their names highlighted in colors corresponding to particular branches (see panel B). *PSY*, phytoene synthase; *PDS*, phytoene desaturase; *ZDS*, ζ-carotene desaturase; *ZISO*, ζ-carotene isomerase; *CRTISO*, carotenoid isomerase; *LCY-E*, lycopene ε-cyclase; *LYC-B*, lycopene β-cyclase; *CRTR-B*, β-ring hydroxylase; *CYC-B*, chromoplast specific lycopene β-cyclase; *ZEP*, zeaxanthin epoxidase; *VDE*, violaxanthin de-epoxidase; *CCD*, carotenoid cleavage dioxygenase. Metabolites are boxed and colored according to their compound colors, whereas white boxes indicate no color. **(B)** Positive selection signatures of genes on different branches are indicated by different colors: red-fruited lineages (Red), and green-fruited lineages (Green).
